# Supplementary material for: Enhancing gold recovery from electronic waste via lixiviant metabolic engineering in Chromobacterium violaceum
Source: PubMed Central journal article supplement — Sci Rep. 2013 Jul 19;3:2236. doi: 10.1038/srep02236 (PMC3715747; doi:10.1038/srep02236), 2013-07-19
Supplement: srep02236-s1.pdf [file srep02236-s1.pdf]

# Enhancing gold recovery from electronic waste *via* lixiviant metabolic engineering in *Chromobacterium violaceum*

Song Buck Tay<sup>1, §</sup>, Gayathri Natarajan<sup>2, §</sup>, Muhammad Nadjad bin Abdul Rahim<sup>1</sup>, Hwee Tong  
Tan<sup>1</sup>, Maxey Ching Ming Chung<sup>1,3</sup>, Yen Peng Ting<sup>2</sup>, and Wen Shan Yew<sup>1</sup>

<sup>1</sup>Department of Biochemistry, Yong Loo Lin School of Medicine, National University of  
Singapore; <sup>2</sup>Department of Chemical and Biomolecular Engineering, Faculty of Engineering,  
National University of Singapore; <sup>3</sup>Department of Biological Sciences, Faculty of Science,  
National University of Singapore.

<sup>§</sup> These authors contributed equally to the work.

Correspondence should be addressed to Y.P.T. (chetyp@nus.edu.sg) and W.S.Y.  
(bchyws@nus.edu.sg).

## Methods

**Construction of *Chromobacterium violaceum* strains.** Wild-type *C. violaceum* ATCC 12472 was obtained from ATCC. The hcnABC operon was PCR amplified from the genomic DNA isolated from *C. violaceum* (ATCC 12472) using Platinum Pfx DNA polymerase (Invitrogen) and the primer sets hcnABC-XbaI-F/hcnABC-XhoI-R (Table S2). The PCR reaction (100  $\mu$ L) contained 1 ng of genomic DNA, 10  $\mu$ L of 10X *Pfx* Amplification Buffer, 1 mM MgSO<sub>4</sub>, 0.4 mM of each dNTP, 40 pmol of each primer, and 5 U of Platinum *Pfx* DNA polymerase. The gene was amplified using a PTC-0200G Thermal Cycler (Bio-Rad Laboratories), with the following parameters: 94 °C for 1 min followed by 40 cycles of: 94 °C for 1 min, 55 °C for 1 min and 15 sec, 68 °C for 5 min, and a final extension of 68 °C for 10 min. Exogenous inducible promoters pBAD and pTac were cloned upstream of the hcnABC operon. The pBAD and pTac promoters were PCR amplified from pBAD33 and pET15b vectors, respectively. The PCR reaction (100  $\mu$ L) contained 1 ng of plasmid DNA, 10  $\mu$ L of 10X *Pfx* Amplification Buffer, 1 mM MgSO<sub>4</sub>, 0.4 mM of each dNTP, 40 pmol of each primer, and 5 U of Platinum *Pfx* DNA polymerase. The gene was amplified using a PTC-0200G Thermal Cycler (Bio-Rad Laboratories), with the following parameters: 94 °C for 1 min followed by 40 cycles of: 94 °C for 1 min, 55 °C for 1 min and 15 sec, 68 °C for 3 min, and a final extension of 68 °C for 10 min.

Figure S1. Growth curves of wild-type and engineered *C. violaceum*. Wild-type *C. violaceum* was grown in the absence of gentamycin, while engineered *C. violaceum* strains were grown in the presence of gentamycin.

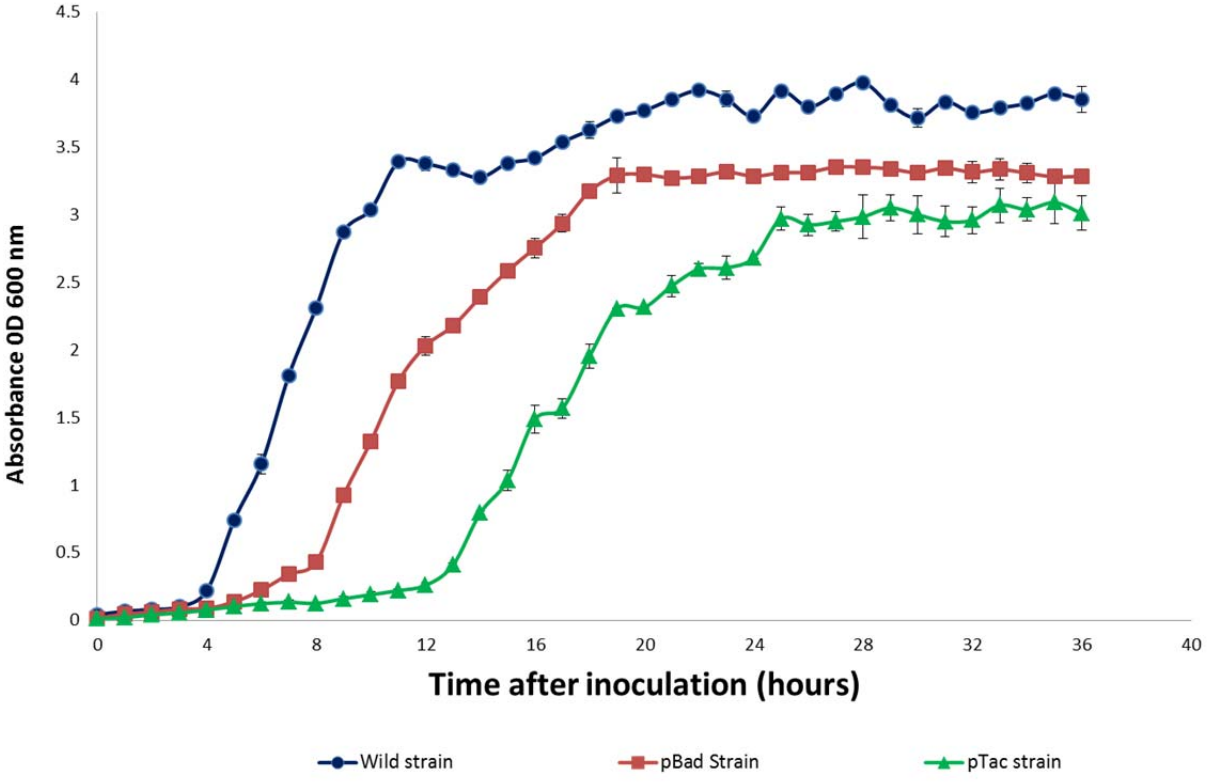

Figure S2. Growth curves of wild-type and engineered *C. violaceum* in the absence of gentamycin. Due to the production of violaceum, growth progress was monitored as a function of colony forming units per mL of bacterial culture (CFU/mL).

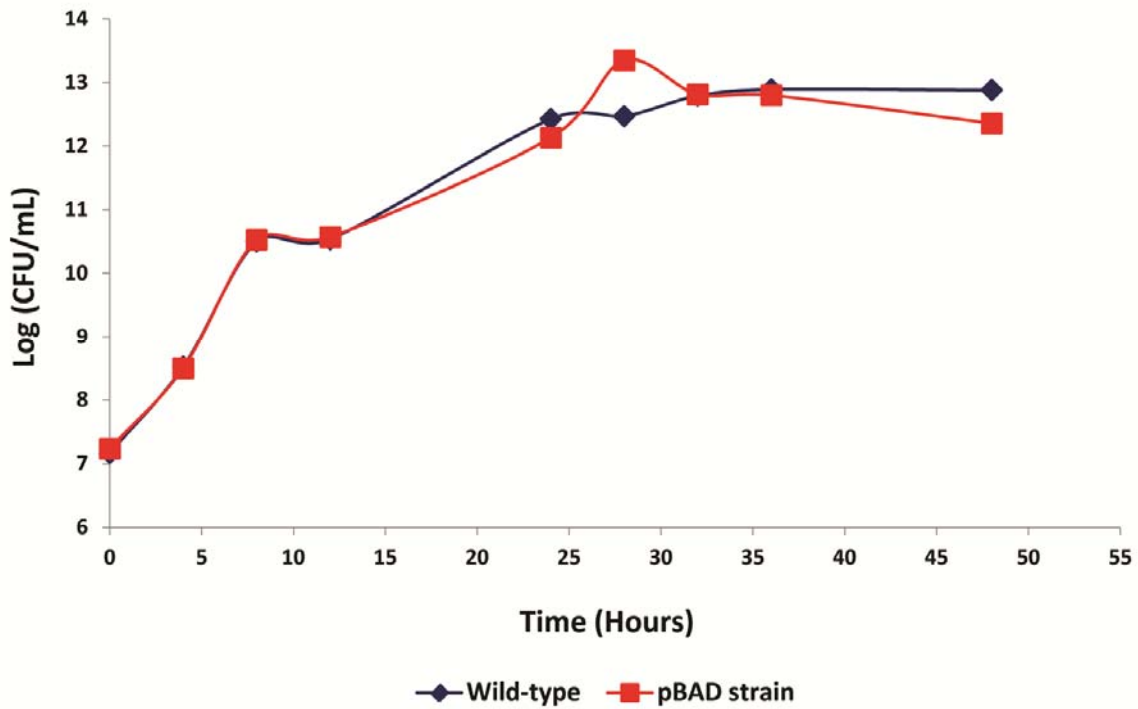

Figure S3. Cyanide production by wild-type and engineered *C. violaceum*.

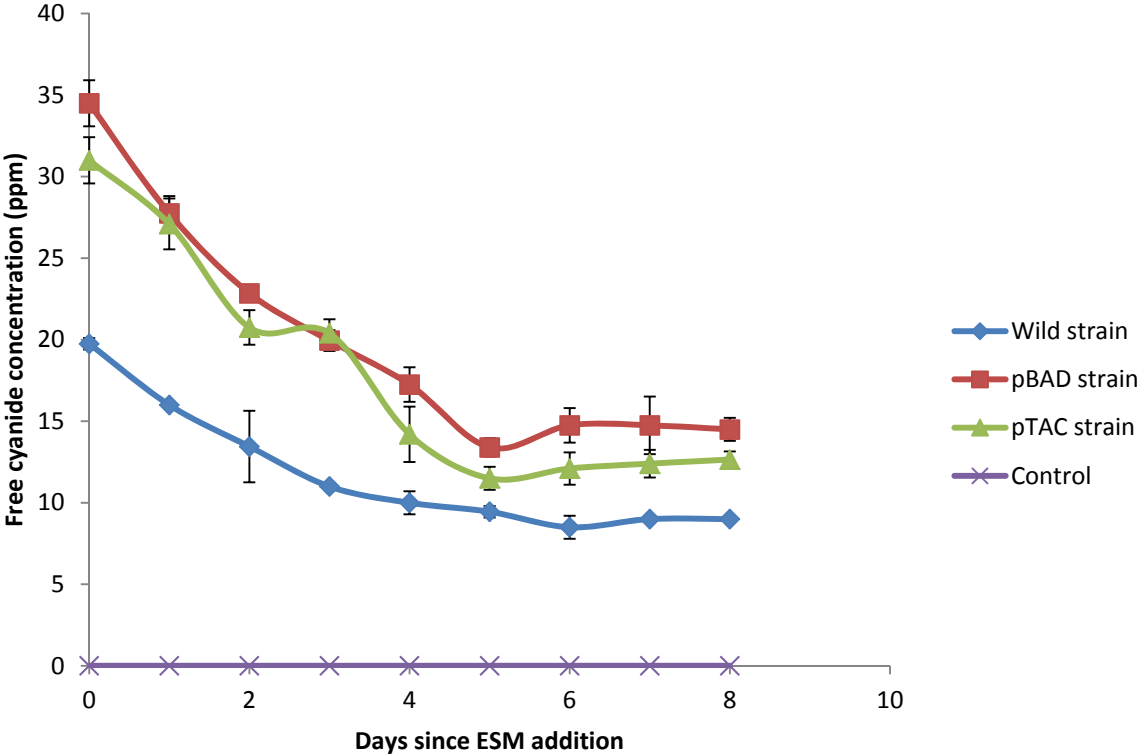

**Table S1. Comparative Proteomics Results**

| Uniprot Accession #                     | Name                                                                               | Relative expression to wild-type | Function                                                                                                                                                                                |
|-----------------------------------------|------------------------------------------------------------------------------------|----------------------------------|-----------------------------------------------------------------------------------------------------------------------------------------------------------------------------------------|
| <b>Proteins Up-regulated</b>            |                                                                                    |                                  |                                                                                                                                                                                         |
| Q7M7F1                                  | Elongation factor Tu ( <i>tuf1</i> )                                               | 1.477                            | 0.186 Promotes the GTP-dependent binding of aminoacyl-tRNA to the A-site of ribosomes during protein biosynthesis                                                                       |
| Q7NQ65                                  | Glutathione synthetase ( <i>gshB</i> )                                             | 1.366                            | 0.245 Catalyzes the reaction: ATP + gamma-L-glutamyl-L-cysteine + glycine = ADP + phosphate + glutathione.                                                                              |
| Q7NQ67                                  | 50S ribosomal protein L6 ( <i>rlpL</i> )                                           | 1.759                            | 0.508 Binds to the 23S rRNA, and is important in its secondary structure. It is located near the subunit interface in the base of the L7/L12 stalk, and near the tRNA binding site of 1 |
| Q7NQ69                                  | 30S ribosomal protein S5 ( <i>rpsE</i> )                                           | 1.456                            | 0.270 With S4 and S12 plays an important role in translational accuracy. Located at the back of the 30S subunit body where it stabilizes the conformation of the head with respect      |
| Q7NXP1                                  | Transcription termination factor Rho ( <i>rho</i> )                                | 1.537                            | 0.254 Facilitates transcription termination by a mechanism that involves Rho binding to the nascent RNA, activation of Rho's RNA-dependent ATPase activity, and release of the r        |
| Q7NXX7                                  | N-succinylglutamate 5-semialdehyde dehydrogenase ( <i>astD</i> )                   | 1.562                            | 0.401 Catalyzes the NAD-dependent reduction of succinylglutamate semialdehyde into succinylglutamate                                                                                    |
| Q7NY10                                  | Purine nucleoside phosphorylase ( <i>pnp</i> )                                     | 2.094                            | 0.548 Involved in RNA degradation                                                                                                                                                       |
| Q7NYY5                                  | Acetaldehyde dehydrogenase ( <i>adhE</i> )                                         | 1.838                            | 1.141 Catalyzes the conversion of acetaldehyde into acetic acid; also facilitates the interconversion between alcohols and aldehydes or ketones with the reduction of NAD+              |
| Q7P1M2                                  | Transketolase 1 ( <i>tktA</i> )                                                    | 2.457                            | 1.334 Involved in the pentose phosphate pathway                                                                                                                                         |
| Q7P255                                  | Probable site-specific DNA-methyltransferase, cytosine-specific ( <i>CV_0006</i> ) | 3.064                            | 1.889 A large group of enzymes involved in transferring methyl group to DNA.                                                                                                            |
| Q7NRN7                                  | Enoyl-[acyl-carrier-protein] reductase [NADH] ( <i>CV_3743</i> )                   | 1.333                            | 0.118 Essential enzyme in the biosynthesis of saturated straight-chain fatty acids                                                                                                      |
| <b>Proteins with no detected change</b> |                                                                                    |                                  |                                                                                                                                                                                         |
| Q7NRJ9                                  | Arginine deiminase ( <i>arcA</i> )                                                 | 1.115                            | 0.385 Catalyzes the reaction: L-arginine + H2O <=> L-citrulline + NH3                                                                                                                   |
| Q7NUY9                                  | ATP-dependent Clp protease proteolytic subunit ( <i>clpP</i> )                     | 1.043                            | 0.190 Cleaves peptides in various proteins in a process that requires ATP hydrolysis. Has a chymotrypsin-like activity. Plays a major role in the degradation of misfolded proteins     |
| Q7NWN7                                  | Chaperone protein ClpB ( <i>clpB</i> )                                             | 0.899                            | 0.142 Part of a stress-induced multi-chaperone system.                                                                                                                                  |
| Q7NXU5                                  | Acetate kinase ( <i>ackA</i> )                                                     | 1.153                            | 0.272 Facilitates the production of acetyl-CoA by phosphorylating acetate in the presence of ATP and a divalent cation                                                                  |
| Q7NYC6                                  | Threonyl-tRNA synthetase ( <i>thrS</i> )                                           | 0.926                            | 0.073 This enzyme participates in glycine, serine and threonine metabolism and aminoacyl-tRNA biosynthesis                                                                              |
| Q7NYI8                                  | Serine hydroxymethyltransferase ( <i>ghyA</i> )                                    | 1.012                            | 0.189 Catalyzes the pyridoxal phosphate-dependent, interconversion of serine and glycine                                                                                                |
| Q7NYR7                                  | Methionyl-tRNA synthetase ( <i>metG</i> )                                          | 0.888                            | 0.189 Required for elongation of protein synthesis and the initiation of all mRNA translation through initiator tRNA(fMet) aminoacylation                                               |
| Q7NZF7                                  | Adenosylhomocysteinase ( <i>ahcY</i> )                                             | 1.118                            | 0.186 May play a key role in the regulation of the intracellular concentration of adenosylhomocysteine                                                                                  |
| Q7P0W5                                  | 2,3,4,5-tetrahydropyridine-2,6-dicarboxylate N-succinyltransferase ( <i>dapD</i> ) | 1.207                            | 0.123 Catalyzes the reaction: Succinyl-CoA + (S)-2,3,4,5-tetrahydropyridine-2,6-dicarboxylate + H2O <=> CoA + N-succinyl-L-2-amino-6-oxoheptanedioate                                   |
| Q7P1M4                                  | Phosphoglycerate kinase ( <i>pgk</i> )                                             | 0.977                            | 0.203 Catalyzes the reaction: ATP + 3-phospho-D-glycerate -> ADP + 3-phospho-D-glyceroyl phosphate                                                                                      |
| Q7NQP9                                  | Probable transcriptional regulator ( <i>CV_4088</i> )                              | 0.944                            | 0.165 Transcriptional regulator                                                                                                                                                         |
| Q7NR07                                  | Putative uncharacterized protein ( <i>CV_3978</i> )                                | 0.941                            | 0.320 Unknown. Top three blastp hits are 'type VI secretion protein'                                                                                                                    |
| Q7NR66                                  | Probable glutaryl-CoA dehydrogenase ( <i>CV_3918</i> )                             | 1.037                            | 0.172 An acyl-CoA dehydrogenase that acts on glutaryl-CoA, creating crotonyl-CoA. It plays a role in the metabolism of lysine, hydroxylysine and tryptophan.                            |
| Q7NRJ7                                  | NAD(P)H-flavin reductase ( <i>ubiB</i> )                                           | 1.108                            | 0.172 Catalyzes the reaction: reduced riboflavin + NADP <=> riboflavin + NADPH + H+                                                                                                     |
| Q7NRS1                                  | Phosphoenolpyruvate synthase ( <i>ppsA</i> )                                       | 0.938                            | 0.221 Catalyzes the phosphorylation of pyruvate to phosphoenolpyruvate                                                                                                                  |
| Q7NS39                                  | Putative uncharacterized protein ( <i>CV_3588</i> )                                | 0.950                            | 0.215 Unknown. Top three blastp hits are 'Rhodanes domain protein'                                                                                                                      |
| Q7NS77                                  | Catalase ( <i>katE</i> )                                                           | 0.921                            | 0.265 Catalyzes the decomposition of hydrogen peroxide to water and oxygen.                                                                                                             |
| Q7NSI0                                  | Chemotaxis protein CheV ( <i>cheV2</i> )                                           | 1.092                            | 0.226 Involved in chemotaxis                                                                                                                                                            |
| Q7NTH1                                  | Glutamate dehydrogenase ( <i>gdhA</i> )                                            | 0.935                            | 0.160 Catalyzes the conversion glutamate to alpha-ketoglutarate                                                                                                                         |
| Q7NU29                                  | L-serine dehydratase ( <i>sdaA1</i> )                                              | 1.065                            | 0.170 Catalyzes the pyridoxal phosphate-dependent, deamination of L-serine to yield pyruvate, with the release of ammonia                                                               |
| Q7NUM7                                  | Putative uncharacterized protein ( <i>CV_2670</i> )                                | 0.963                            | 0.129 Unknown. Top four hits 'Amidohydrolase 3'                                                                                                                                         |
| Q7NV74                                  | Aconitate hydratase 2 ( <i>acnB</i> )                                              | 1.042                            | 0.212 Catalyzes the stereo-specific isomerization of citrate to isocitrate via cis-aconitate in the TCA cycle                                                                           |
| Q7NWD9                                  | Probable zinc-containing alcohol dehydrogenase ( <i>CV_2051</i> )                  | 1.058                            | 0.274 Probable alcohol dehydrogenase                                                                                                                                                    |
| Q7NWT8                                  | Probable outer membrane protein ( <i>CV_1891</i> )                                 | 0.933                            | 0.097 Unknown. Outer membrane protein belonging to OmpA family                                                                                                                          |
| Q7NXH6                                  | Glycine C-acetyltransferase ( <i>kbl</i> )                                         | 0.881                            | 0.102 Associated with the biosynthesis of threonine                                                                                                                                     |
| Q7NZ48                                  | Dihydrodipolyl dehydrogenase ( <i>lpdA2</i> )                                      | 0.955                            | 0.207 Catalyzes the reaction: Protein N(6)-(dihydrodipolyl)lysine + NAD+ <=> protein N(6)-(lipoyl)lysine + NADH.                                                                        |
| Q7NZ51                                  | 2-oxoglutarate dehydrogenase E1 component ( <i>sucA</i> )                          | 1.084                            | 0.281 Part of alpha-ketoglutarate dehydrogenase complex                                                                                                                                 |
| Q7NZ52                                  | Citrate synthase ( <i>gttA</i> )                                                   | 0.984                            | 0.127 Catalyzes the reaction: Acetyl-CoA + H2O + oxaloacetate -> citrate + CoA for TCA cycle                                                                                            |
| Q7P022                                  | Probable transformylase ( <i>CV_0747</i> )                                         | 0.978                            | 0.219 Possible transformylase in nucleotide biosynthesis                                                                                                                                |
| Q7P0M6                                  | Putative uncharacterized protein ( <i>CV_0540</i> )                                | 1.153                            | 0.131 Unknown. High similarity with uncharacterised proteins in <i>P.aeruginosa</i>                                                                                                     |
| Q7P182                                  | Aromatic-amino-acid transaminase ( <i>tyrB2</i> )                                  | 0.882                            | 0.215 Aminotransferase                                                                                                                                                                  |
| Q7P1T7                                  | Ribonuclease G ( <i>cafA</i> )                                                     | 0.920                            | 0.168 Catalyzes degradation of RNA                                                                                                                                                      |
| Q7P210                                  | Uroporphyrin-III C-methyltransferase ( <i>hemX</i> )                               | 1.275                            | 0.362 Catalyzes two methylation reactions forming precorrin-1 and precorrin-2                                                                                                           |
| Q7NQE4                                  | 50S ribosomal protein L10 ( <i>rlpJ</i> )                                          | 0.979                            | 0.220 Part of 70S ribosome                                                                                                                                                              |
| Q7NQF7                                  | 50S ribosomal protein L22 ( <i>rlpV</i> )                                          | 0.841                            | 0.145 Part of 70S ribosome                                                                                                                                                              |
| Q7NRX0                                  | Cyanide insensitive terminal oxidase ( <i>cioA</i> )                               | 1.002                            | 0.066 Cyanide-insensitive terminal cytochrome oxidase in the respiratory electron transport chain                                                                                       |
| Q7NQ31                                  | L-allo-Threonine aldolase ( <i>CV_4309</i> )                                       | 1.135                            | 0.214 Catalyzes the pyridoxal phosphate-dependent, reversible reaction between threonine and acetaldehyde plus glycine                                                                  |
| Q7NSJ5                                  | Glycine dehydrogenase [decarboxylating] ( <i>gcvP</i> )                            | 1.223                            | 0.625 Catalyzes the degradation of glycine as part of the glycine cleavage system                                                                                                       |
| <b>Proteins Down-regulated</b>          |                                                                                    |                                  |                                                                                                                                                                                         |
| Q7P190                                  | Urocanate hydratase ( <i>hutU</i> )                                                | 0.651                            | 0.114 Involved in the degradation of Histidine                                                                                                                                          |
| Q9ZH11                                  | Acetyl-CoA acetyltransferase ( <i>phaA</i> )                                       | 0.445                            | 0.099 Competes with fatty acid synthesis for acetyl-CoA; produces acetoacetyl-CoA from acetyl-CoA                                                                                       |
| Q7NXP8                                  | Putative uncharacterized protein ( <i>CV_4364</i> )                                | 0.426                            | 0.208 Unknown. Top few blastp hits are also uncharacterized proteins from a range of bacterial species                                                                                  |
| Q7NR08                                  | Putative uncharacterized protein ( <i>CV_3977</i> )                                | 0.387                            | 0.042 Unknown. Top three blastp hits are 'Type VI secretion system effector'                                                                                                            |
| Q7NS55                                  | Outer membrane protein A ( <i>rmpM</i> )                                           | 0.250                            | 0.160 Outer membrane protein found in Neisseria species                                                                                                                                 |
| Q7NSF9                                  | Transmembrane protein ( <i>elaB</i> )                                              | 0.434                            | 0.059 Unknown function. Ribosome binding, probably membrane-anchored.                                                                                                                   |
| Q7NTK8                                  | 30S ribosomal protein S1 ( <i>rpsA</i> )                                           | 0.723                            | 0.123 Binds mRNA; thus facilitating recognition of the initiation point. It is needed to translate mRNA with a short Shine-Dalgarno (SD) purine-rich sequence.                          |
| Q7NUH8                                  | 3-hydroxyacyl-CoA dehydrogenase ( <i>fadB</i> )                                    | 0.637                            | 0.096 Associated with beta-oxidation of fatty acids                                                                                                                                     |
| Q7NV31                                  | Amidophosphoribosyltransferase ( <i>purF</i> )                                     | 0.704                            | 0.136 Catalyzes the conversion of alpha-phosphoribosylpyrophosphate (alpha-PRPP) into 5-beta-phosphoribosylamine                                                                        |
| Q7NV42                                  | Superoxide dismutase ( <i>sodB1</i> )                                              | 0.551                            | 0.068 Destroys radicals normally produced within cells                                                                                                                                  |
| Q7NVG0                                  | Putative uncharacterized protein ( <i>CV_2383</i> )                                | 0.637                            | 0.403 Unknown. Low identity blastp hits.                                                                                                                                                |
| Q7NWA2                                  | Acetyl-CoA C-acetyltransferase ( <i>atoB</i> )                                     | 0.523                            | 0.163 Competes with fatty acid synthesis for acetyl-CoA; produces acetoacetyl-CoA from acetyl-CoA                                                                                       |
| Q7NWA4                                  | 3-hydroxybutyryl-CoA dehydrogenase ( <i>phaH</i> )                                 | 0.637                            | 0.156 Involved in breakdown of metabolites in butanoate metabolism into acetoacetyl-CoA                                                                                                 |
| Q7NWH0                                  | Probable aldehyde dehydrogenase ( <i>CV_2019</i> )                                 | 0.676                            | 0.085 Catalyzes the oxidation of aldehydes                                                                                                                                              |
| Q7NX40                                  | Protein kinase ( <i>prkA</i> )                                                     | 0.745                            | 0.113 Phosphorylates protein                                                                                                                                                            |
| Q7NXP2                                  | Thioredoxin ( <i>trxA</i> )                                                        | 0.435                            | 0.194 Redox protein playing critical roles in reducing oxidative stress and as an electron donor to ribonucleotide reductase                                                            |
| Q7NYA8                                  | Probable phasin ( <i>CV_1366</i> )                                                 | 0.523                            | 0.150 Poly(hydroxyalcanoate) granule associated protein; storage polyesters                                                                                                             |
| Q7NYB1                                  | Probable trans-acting regulatory HvrA protein ( <i>CV_1363</i> )                   | 0.412                            | 0.076 Protein that modulates protein expression                                                                                                                                         |
| Q7NYU5                                  | Probable small heat shock protein ( <i>CV_1177</i> )                               | 0.338                            | 0.099 Involved in the proper folding of proteins and can protect proteins from heat-induced denaturation                                                                                |
| Q7NZK6                                  | NADP-dependent malate dehydrogenase ( <i>maeB</i> )                                | 0.535                            | 0.106 Catalyzes the reversible oxidative decarboxylation of L-malate using NAD(P)(+)- as a cofactor                                                                                     |
| Q7NZQ3                                  | Putative uncharacterized protein ( <i>CV_0868</i> )                                | 0.288                            | 0.086 Unknown. Top few blastp hits are also uncharacterized proteins from a range of bacterial species                                                                                  |
| Q7P1C4                                  | Glutathione S-transferase family protein ( <i>gst2</i> )                           | 0.386                            | 0.263 Probably has a role in cell signalling.                                                                                                                                           |
| Q7NQX1                                  | 60 kDa chaperonin 2 ( <i>groL2</i> )                                               | 0.561                            | 0.185 Prevents misfolding and promotes the refolding and proper assembly of unfolded polypeptides generated under stress conditions                                                     |

Table S2. Primers used in strain construction.

| Name of Primer                 | Sequence                                                                                                                        | Remarks                                                                       |
|--------------------------------|---------------------------------------------------------------------------------------------------------------------------------|-------------------------------------------------------------------------------|
| hcnABC-XbaI-F<br>hcnABC-XhoI-R | 5' GACACCTGTATCGCTCTAGAGAACCGGGGCAATGGCGGAACCC 3'<br>5' GGCTCAGTGAGAGGACTCGAGTCAGGCGTGCAGCGCAAATCC 3'                           | Forward and reverse primers for cloning <i>hcnABC</i> into pUC18-mini-Tn7T-Gm |
| pBAD BamHI<br>pBAD XbaI        | 5' ATTGTCTGATTCGTGGATCCTTATGACAACCTTGACGGCTAC 3'<br>5' CAAAATTATTTGAGCTCTCTAGAGCTAGCCCAAAAAACGGG 3'                             | Forward and reverse primers for cloning PBAD promoter into pUC18-mini-Tn7T-Gm |
| pTAC BamHI<br>pTAC XbaI        | 5' CGTTGGGATCCCTGCCCGCTTCCAGTCGGGAAACCTGTCGTGCCAGCTGC 3'<br>5' CTAGTCTAGAACATTATACGAGCCGATGATTAATTGTCAGTGAAACCAGTAACGTTATACG 3' | Forward and reverse primers for cloning Ptac promoter into pUC18-mini-Tn7T-Gm |
| P-Tn7L<br>P-0678               | 5' ATTAGCTTACGACGCTACACCC 3'<br>5' TCGAGCCAAGGCCGA CGAAC 3'                                                                     | Forward and reverse sequencing primers specific for site of Tn7L integration  |
